# Supplementary material for: The One With Highest Tumor Proportion Score of Multiple Core Needle Biopsies From the Tumor Can Best Represent PD-L1 Status Estimated by Whole Surgical Specimen in Non-small Cell Lung Cancer
Source: Research Square preprint supplement (doi:10.21203/rs.3.rs-103082/v1), 2020-11-12
Supplement: Supplementary file 1 [file 4c7f27df09e68c6276184043.docx]

Supplementary table 3. the PD-L1 distribution of core needle biopsies classified by histological subtypes

|  | PD-L1 distribution of core needle biopsies | | |  |
| --- | --- | --- | --- | --- |
| Histological subtypes | 3 status a | 2 status b | 1 status c | *P* value |
| Adenocarcinoma | 1 | 14 | 19 | 0.848 |
| squamous cell carcinoma | 0 | 6 | 9 |
| Other | 0 | 2 | 0 |

Note: The biopsies were divided into 3 PD-L1 status according to TPS: negative, TPS＜1%; low expression: TPS=1-49%; high expression: TPS≥50%. a, the biopsies from one patient covered 3 status; b, the biopsies from one patient covered 2 status; c, the biopsies from one patient covered 1 status.
